# Supplementary material for: Catalytic performance of Ni–Co/HZSM-5 catalysts for aromatic compound promotion in simulated bio-oil upgrading
Source: Royal Society of Chemistry journal article supplement (doi:10.1039/d2ra07706j), 2023-01-01
Supplement: d2ra07706j1.pdf [file d2ra07706j1.pdf]

## Supporting Information

### **Catalytic performance of Ni-Co/HZSM-5 catalysts for aromatic compound promotion in simulated bio-oil upgrading**

Liyuan Qin<sup>\*a b</sup>, Jiani Li<sup>a</sup>, Shengming Zhang<sup>a b</sup>, Zhongyuan Liu<sup>a</sup>, Shuang Li<sup>a</sup>, Lina Luo<sup>a</sup>

<sup>a</sup> *College of Engineering, Northeast Agricultural University, Harbin, 150030, China.*

<sup>b</sup> *Key Laboratory of Pigbreeding Facilities Engineering, Ministry of Agriculture and Rural Affairs, Harbin 150030, China*

\* Correspondence

Liyuan Qin

E-mail address: [qinliyuan2006@163.com](mailto:qinliyuan2006@163.com)

---

\* Corresponding author. E-mail: [qinliyuan2006@163.com](mailto:qinliyuan2006@163.com) (L. Qin)

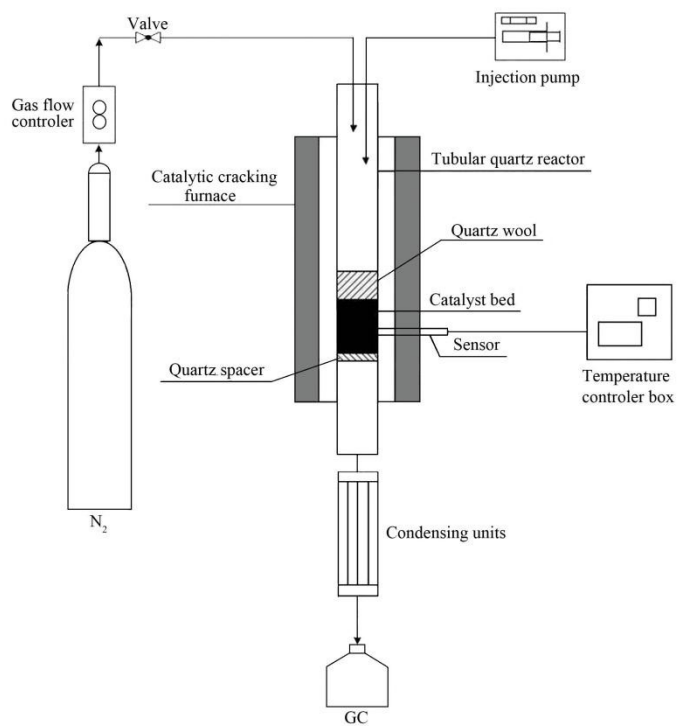

**Fig. S1.** Diagram of the experimental setup.

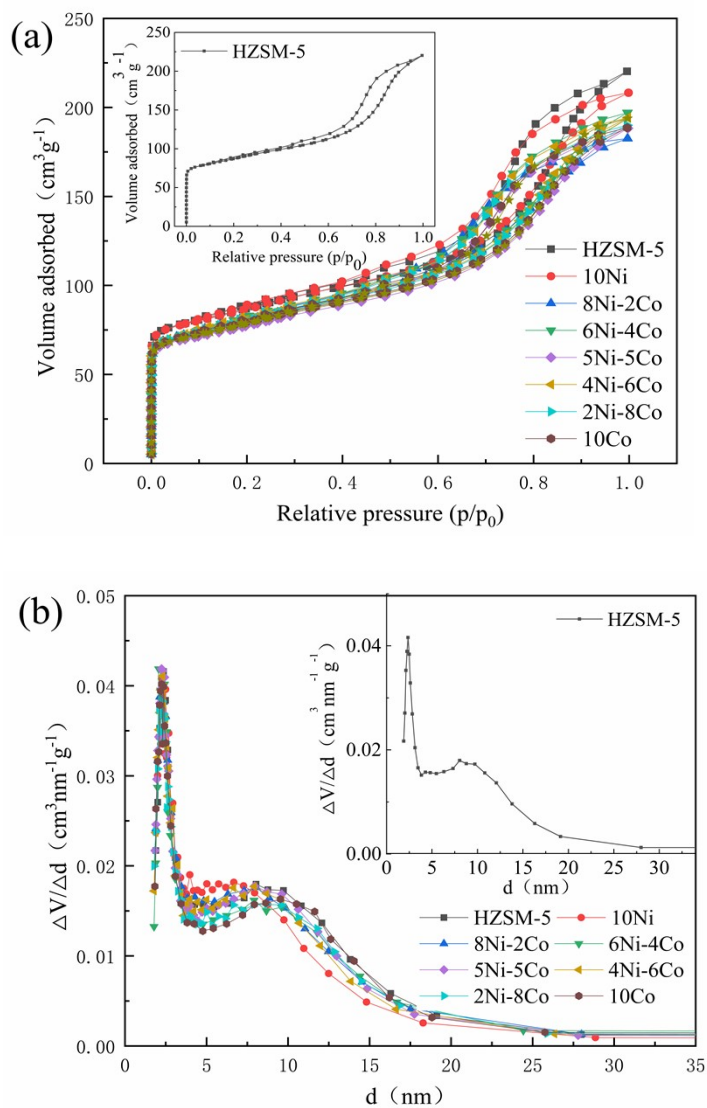

**Fig. S2** (a)  $N_2$  adsorption-desorption isotherms and (b) pore size distribution curves for the Ni-Co/HZSM-5 catalysts.

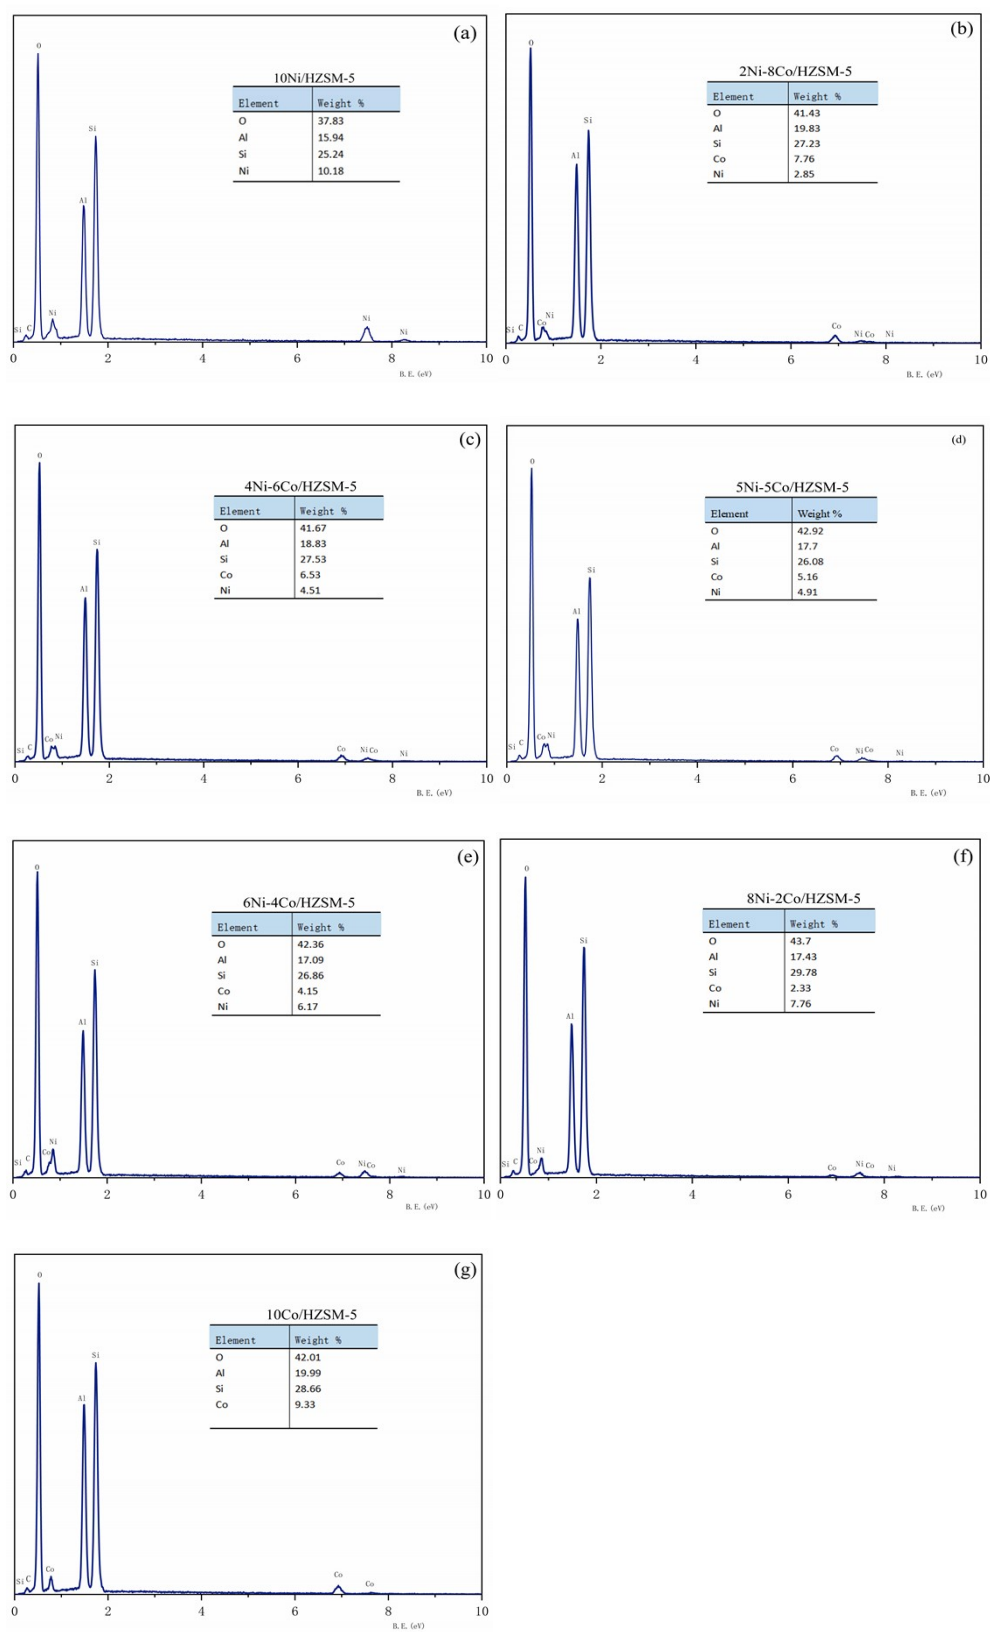

Fig. S3. EDS data for the Ni-Co/HZSM-5 catalysts.

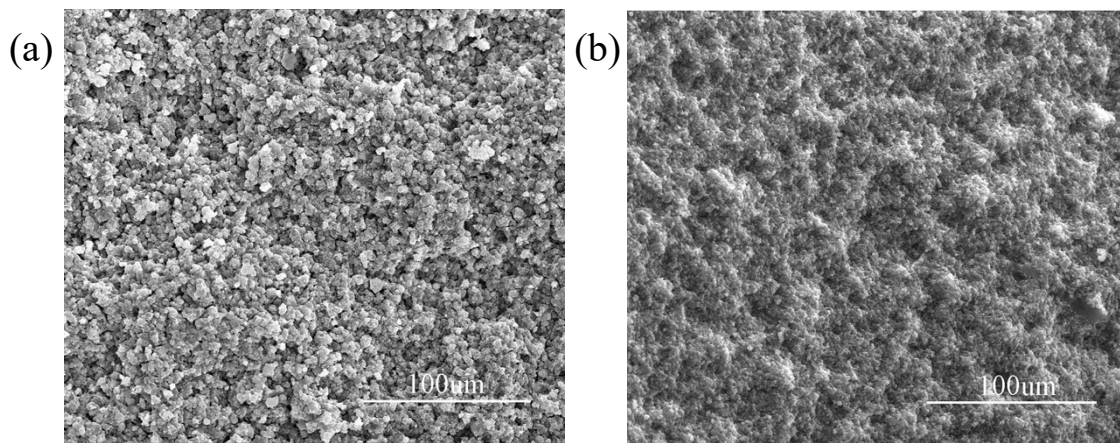

**Fig. S4.** SEM images of the regenerated catalysts: (a) 6Ni-4Co/HZSM-5 and (b) 10Ni/HZSM-5.

**Table S1.** Binding energies of the 6Ni-4Co/HZSM-5 catalyst.

| 6Ni-4Co/HZSM-5<br>Catalyst | Binding energy<br>(eV)<br>(Co2p <sub>3/2</sub> -Co2p <sub>1/2</sub> ) | Binding energy (eV) |       |                     |       |       |       |                 |                  |       |       |       |  |
|----------------------------|-----------------------------------------------------------------------|---------------------|-------|---------------------|-------|-------|-------|-----------------|------------------|-------|-------|-------|--|
|                            |                                                                       | Co <sup>3+</sup> 2p |       | Co <sup>2+</sup> 2p |       | Sat   |       | Co <sup>0</sup> | Ni <sup>2+</sup> |       | sat   |       |  |
|                            |                                                                       | 3/2                 | 1/2   | 3/2                 | 1/2   | 3/2   | 1/2   | 3/2             | 3/2              | 1/2   | 3/2   | 1/2   |  |
| Fresh                      | 797.4-782.1 ( 15.3 )                                                  | 781.3               | 796.6 | 783.3               | 798.4 | 785.4 | 802.6 |                 | 856.6            | 874.4 | 862.7 | 881.2 |  |
| After 10 min               | 797.4-782.1 ( 15.3 )                                                  | 781.3               | 796.6 | 783.3               | 798.4 | 785.7 | 802.7 | 776.5           | 856.6            | 874.4 | 862.9 | 881.3 |  |
| After 20 min               | 797.4-782.1 ( 15.3 )                                                  | 781.4               | 796.7 | 783.2               | 798.4 | 785.7 | 802.7 |                 | 856.6            | 874.4 | 862.7 | 881.0 |  |
| After 30 min               | 797.4-782.1 ( 15.3 )                                                  | 781.3               | 796.6 | 783.2               | 798.4 | 785.7 | 802.7 | 776.5           | 856.6            | 874.4 | 862.7 | 881.1 |  |
